# Supplementary material for: Performance of four computer-coded verbal autopsy methods for cause of death assignment compared with physician coding on 24,000 deaths in low- and middle-income countries
Source: PubMed Central journal article supplement (PMC3912488; doi:10.1186/1741-7015-12-20), 2014-02-04
Supplement: 1741-7015-12-20-S2.pdf [file 1741-7015-12-20-S2.pdf]

## Additional file 2: Description of comparison metrics

| Metric                                    | Equation                                                                                                                                         | Explanation                                                                                                                                                                   |
|-------------------------------------------|--------------------------------------------------------------------------------------------------------------------------------------------------|-------------------------------------------------------------------------------------------------------------------------------------------------------------------------------|
| Positive Predictive Value                 | $PPV = \frac{TP}{TP + FP}$                                                                                                                       | Proportion of positive test results that are true positives (correct diagnoses)                                                                                               |
| Partial Chance-Corrected Concordance [15] | $PCCC(k) = \frac{C - \frac{k}{N}}{1 - \frac{k}{N}}$ <p>*C is the fraction of deaths for which the true cause is in the top k assigned causes</p> | Used for probabilistic methods that assign probabilities of multiple causes of death for each VA case                                                                         |
| CSMF Absolute Error [15]                  | $\sum_{j=1}^k  CSMF_j^{true} - CSMF_j^{pred} $                                                                                                   | Sum of the amount by which the estimated CSMF deviates from the true CSMF, for each of cause of death                                                                         |
| CSMF Accuracy [15]                        | $CSMFAccuracy = 1 - \frac{\sum_{j=1}^k  CSMF_j^{true} - CSMF_j^{pred} }{2(1 - \text{Minimum}(CSMF_j^{true}))}$                                   | Similar to CSMF error, but adjusts for a correct diagnosis made by chance; results are relative to the worst possible performance (where each death is incorrectly diagnosed) |
